# Supplementary material
Source: MDPI journal article supplement (https://www.mdpi.com/1424-2818/5/2/149)
Supplement: s1 [file s1]

**Appendix 1.** Locality name by mitochondrial DNA (mtDNA) clade membership, geographic coordinates, and sample size for mtDNA cytochrome *b* sequence analysis for specimens of lake chub (*Couesius plumbeus*) and outgroup taxa. AB = Alberta, BC = British Columbia, LB = Labrador, MB = Manitoba, MN = Minnesota, NS = Nova Scotia, NB = New Brunswick, NWT = Northwest Territories, NY = New York, ON = Ontario, QC = Québec, SK = Saskatchewan, WY = Wyoming, YT = Yukon Territory. Localities annotated with a “\*”, “#”, or “^” represent putative *Couesius plumbeus greeni*, *C. p. dissimilis*, and *C. p. plumbeus*, respectively.

| Locality                         | Latitude/longitude   | N  | Haplotypes present |
|----------------------------------|----------------------|----|--------------------|
| Lake chub: Western clade         |                      |    |                    |
| *Jewel Lake, BC                  | 49°10'29" 118°36'35" | 5  | Cp33, 34           |
| *Eleonor Lake, BC                | 54°14'51" 125°25'39" | 2  | Cp3, 16            |
| *Canim Lake, BC                  | 51°51'32" 120°44'58" | 5  | Cp3                |
| *Needle Lake, BC                 | 53°48'53" 127°00'19" | 3  | Cp3                |
| *Bog Pond, BC                    | 54°29'19" 122°40'52" | 1  | Cp3                |
| *Huble Lake, BC                  | 54°16'10" 122°36'59" | 12 | Cp3, 16            |
| *Pothole Lakes, BC               | 55°35'39" 123°22'42" | 3  | Cp15, 29           |
| *Arctic Lake, BC                 | 54°25'13" 121°40'26" | 5  | Cp3                |
| *Green Lake, BC                  | 51°22'35" 121°15'47" | 8  | Cp3, 6             |
| *Tezzeron Lake, BC               | 54°43'54" 124°29'01" | 3  | Cp3, 13            |
| *Mill Creek, BC                  | 58°15'52" 123°41'17" | 5  | Cp3, 30            |
| *Liard Hotsprings, BC            | 59°25'43" 126°05'18" | 10 | Cp3, 7, 30         |
| *Atlin Warmspring, BC            | 59°24'14" 133°34'31" | 10 | Cp3, 30            |
| *Greywatch Creek, BC             | 57°15'56" 122°14'39" | 1  | Cp3                |
| *Hutchinson Creek, BC            | 59°24'14" 133°34'31" | 1  | Cp3                |
| *Blueberry Creek, BC             | 56°44'60" 121°42'50" | 1  | Cp3                |
| *Hornline Creek, BC              | 59°58'46" 127°23'44" | 1  | Cp3                |
| *Dina Lake No. 1, BC             | 55°31'39" 123°18'46" | 2  | Cp3                |
| *Alexander Creek, BC             | 56°31'15" 121°46'47" | 2  | Cp3                |
| *Tetsa River, BC                 | 58°38'19" 124°09'39" | 2  | Cp3                |
| *Quartet Lake, YT                | 65°07'30" 134°26'46" | 1  | Cp3                |
| *Yukon River, YT <sup>1</sup>    | Unknown              | 1  | Cp1                |
| #Nahanni River, NWT <sup>2</sup> | 61°57'29" 127°13'02" | 8  | Cp3, 35 - 40       |
| #Mackenzie River, NWT            | 69°03'31" 134°44'10" | 4  | Cp3, 26, 27, 28    |
| #Smoky River, AB <sup>3</sup>    | 55°14'08" 118°15'33" | 1  | Cp20               |
| #Economy Creek, AB               | 54°52'53" 118°15'13" | 1  | Cp8                |
| #Medley River, AB                | 53°56'11" 110°31'30" | 2  | Cp2                |
| #Rolph Creek, AB                 | 49°07'13" 113°08'29" | 2  | Cp3                |
| #South Milk River, AB            | 49°05'23" 112°23'52" | 2  | Cp11               |
| #St. Mary River, AB              | 49°05'07" 113°13'27" | 2  | Cp14               |

## Appendix 1. Cont.

| Locality                                             | Latitude/longitude   | N | Haplotypes present |
|------------------------------------------------------|----------------------|---|--------------------|
| #Swift Current Creek, SK                             | 50°36'04" 107°43'29" | 2 | Cp14               |
| #Frenchman River, SK                                 | 49°05'56" 107°24'16" | 2 | Cp14               |
| #Rock Creek, SK                                      | 49°00'04" 106°47'54" | 2 | Cp14               |
| #Hayes Creek, MB                                     | 56°17'32" 95°22'13"  | 5 | Cp20, 24, 25       |
| #Churchill River, MB                                 | 57°48'15" 95°20'41"  | 5 | Cp21, 22, 23       |
| #Squaw Creek, WY                                     | 42°50'38" 109°11'13" | 2 | Cp10               |
| #Nowood River, WY                                    | 44°15'46" 107°58'07" | 2 | Cp10               |
| Lake chub: Eastern clade                             |                      |   |                    |
| ^Turkey Lake, ON                                     | 47°02'53" 84°25'09"  | 3 | Cp17, 19           |
| ^Magpie Lake, ON                                     | 50°37'11" 92°24'05"  | 2 | Cp12               |
| ^Vineland Creek, ON                                  | 45°11'38" 79°23'38"  | 1 | Cp17               |
| ^Sheridan Creek, ON                                  | 43°31'02" 79°36'54"  | 1 | Cp17               |
| ^Lake Huron, ON                                      | 46°07'37" 82°52'02"  | 1 | Cp18               |
| ^Nephigee R., LB                                     | 58°31'59" 68°18'00"  | 5 | Cp17               |
| ^Coady's Pond No. 1, LB                              | 56°31'18" 63°53'35"  | 5 | Cp18               |
| ^Lac-Legendre, QC                                    | 46°38'19" 74°18'10"  | 5 | Cp18               |
| ^Lac Dalpec, QC                                      | 46°45'14" 74°21'19"  | 4 | Cp18, 31           |
| ^Lac Aigneau, QC                                     | 57°13'00" 70°07'28"  | 5 | Cp17               |
| ^Chiganois River, NS                                 | 45°24'45" 63°46'47"  | 9 | Cp4                |
| ^Catamaran Brook, NB                                 | 46°52'53" 66°05'57"  | 5 | Cp4, 5             |
| ^Little River tributary, NY                          | 44°00'41" 74°35'42"  | 3 | Cp17               |
| #Lake Superior, MN                                   | 47°23'13" 91°07'45"  | 4 | Cp9, 32            |
| Outgroups                                            |                      |   |                    |
| Redside shiner<br>( <i>Richardsonius balteatus</i> ) |                      |   |                    |
| Main Creek, UT <sup>3</sup>                          | 40°23'38" 111°26'31" | 1 |                    |
| Yakima River, WA <sup>4</sup>                        | 46°25'01" 120°19'51" | 1 |                    |
| Peamouth chub ( <i>Mylocheilus caurinus</i> )        |                      |   |                    |
| Stave Lake, BC <sup>5</sup>                          | 49°21'30" 122°17'46" | 1 |                    |

<sup>1</sup> Genbank accession number AF452083.<sup>2</sup> Unnamed lake adjacent to river.<sup>3</sup> Genbank accession number GU182814.<sup>4</sup> Approximate coordinates only, Genbank accession number GU182876.<sup>5</sup> Genbank accession number AF117169.
